# Supplementary material
Source: PubMed Central journal article supplement (PMC3048157)
Supplement: 1016567108_pnas.1016567108_SI.pdf [file 1016567108_pnas.1016567108_SI.pdf]

# Supporting Information

Wei et al. 10.1073/pnas.1016567108

## SI Materials and Methods

**Protein Expression and Purification.** The coding sequence of MyoX\_MF (NCBI access number: NP\_036466, residues 1503–2047) was PCR amplified from a human brain cDNA library and cloned into a pET32a vector. The coding sequences of DCC\_P3 (NCBI access number: NP\_036973, residues 1409–1445) and its N-terminal extension versions (residues 1321–1445 for P2–P3 and 1370–1445 for the extended P3) was PCR amplified from rat *DCC* gene. Its various mutants were generated by PCR based site-directed mutagenesis. The coding sequences for neogenin\_P3 (residues 1397–1477) was PCR amplified from mouse *neogenin* gene. For MyoX\_MF/DCC\_P3 fusion constructs, DCC\_P3 (residues 1409–1445) was fused to MyoX\_MF at its N terminus or C terminus by PCR. The C-terminal fusion protein has two linker residues (Ser and His) between MyoX\_MF and DCC\_P3 introduced by the cloning process. DCC fragments and their various mutants were expressed as either His<sub>6</sub>-tagged or GST-tagged proteins and purified using Ni<sup>2+</sup>-nitrilotriacetic acid agarose affinity chromatography or with GSH-Sepharose column, followed by another step of gel filtration chromatography. Fusion proteins were expressed as His<sub>6</sub>-tagged proteins and purified using Ni<sup>2+</sup>-nitrilotriacetic acid agarose affinity chromatography, followed by one more step of gel filtration chromatography.

**Crystallography.** Crystals of the MyoX\_MF/DCC\_P3 fusion protein were obtained by hanging drop vapor diffusion method at 16 °C within 2 days. To set up a hanging drop, 1 μl of concentrated protein solution (10 mg/ml) was mixed with 1 μl of crystallization solution with approximately 8% PEG8000 and 10% glycerol in 0.1 M HEPES buffer (pH 7.5). To prepare heavy-atom derivatives, crystals were soaked in the crystallization solution containing 1 mM KAu(CN)<sub>2</sub> for two days. Before diffraction experiments, crystals were soaked in crystallization solution containing additional 10% glycerol for cryoprotection. Several diffraction datasets of native crystal and its Au-derivative were collected at 100 K on a Rigaku RAXIS IV++ imaging-plate system with a MicroMax-007 copper rotating-anode generator. The diffraction data were processed and scaled using the MOSFLM and SCALA in the CCP4 suite (1).

Four Au sites were found by SHELXD (2). The site refinements and phase improvements were carried out by autoSHARP (3). After manual backbone building, the phase was further improved by RESOLVE (4) and then used as input for ARP/wARP model building (5). The initial model was refined in Refmac5 (6) against the 2.5-Å native dataset. COOT (7) was used for model rebuilding and adjustments. In the final stage, an additional TLS refinement was performed in Refmac5 (8). The final model was also used for the refinement of a 2.7-Å dataset, which was collected from a crystal in the same crystallization condition as the 2.5-Å one but containing 50 mM NaI.

**Structure and Sequence Analysis.** The sequence alignment of the MyTH4 domain combined both the primary sequences of the domains as well as the structure of the MyoX MyTH4 structure determined in this work. The consensus pattern of the alignment sequences was characterized using WebLogo (9). All structure figures were prepared by PyMOL (<http://www.pymol.org/>).

**GST Pulldown Assay.** The plasmid coding the GFP-tagged full-length human MyoX expression was a gift from Wencheng Xiong. The point or deletion mutations of MyoX: MyoX\_MF (residues 1503–2047), MyoX\_MyTH4 (residues 1503–1703), MyoX\_FERM (residues 1696–2047), SH mutant (residues 1503–2047, S1718 H1719/AA), SHDEK mutant (residues 1503–2047, S1718 H1719 D1763 E1769 K1770/AAAAA) were cloned into pEGFP-C-3 vector for GFP-tagged protein expression. Direct interactions between DCC\_P3 and various MyoX MyTH4-FERM mutants were assayed in phosphate-buffered saline (pH 7.4). GST-DCC\_P3 fragment (approximately 0.6 nmol each) was first incubated for 30 minutes with GSH-Sepharose beads, and the GST-DCC\_P3 loaded beads washed twice each with 0.5 ml assay buffer. GFP-tagged MyoX\_MF, MyoX\_MyTH4, MyoX\_FERM, MyoX\_MF(SH/AA), and MyoX\_MF(SHDEK/AAAAA) were transiently transfected in HEK293T cells with lipofectamine PLUS kit (Invitrogen) and incubated for 18 hr at 37 °C. Cells were lysed in 1% Triton X-100 lysis buffer (150 mM NaCl, 10% glycerol, 50 mM HEPES pH7.6, 1.5 mM MgCl<sub>2</sub>, 0.1 M NaF, 1 mM EGTA) on ice for 30 min and centrifuged at 13,000 rpm for 30 min. Lysate was each pelleted by the GST-DCC\_P3 coated GSH-Sepharose beads. The pellets were washed three times each with 0.5 ml of the assay buffer, subsequently boiled with 15 μl of 2× SDS/PAGE sample buffer and separated by SDS/PAGE. The GFP-tagged proteins were visualized by immuno-detection using antiGFP antibody.

**Isothermal Titration Calorimetry Assay.** ITC measurements were carried out on a VP-ITC calorimeter (Microcal) at 25 °C. All protein samples were in 50 mM Tris buffer, pH 7.5 containing 100 mM NaCl. The titration processes were performed by injecting 10 μl aliquots of the Trx-tagged DCC\_P3 or neogenin\_P3 fragments into MyoX\_MF proteins at time intervals of 3 minutes to ensure that the titration peak returned to the baseline. The titration data were analyzed using the program Origin7.0 from Microcal and fitted using the one-site binding model.

**Sedimentation Equilibrium.** The MyoX\_MF/DCC\_P3 fusion protein with different concentrations was analyzed on a Beckman XL-I analytical ultracentrifuge under 11,000 rpm at 25 °C. The partial specific volume of protein sample and the solvent density were calculated using the program SEDNTERP (<http://www.rasmb.bbri.org/>). The final sedimentation equilibrium data were analyzed and fitted to a single-species model to get the molecular mass using the XL-A/XL-I data analysis software provided by the manufacturer.

1. Collaborative Computational Project N (1994) The CCP4 suite: Programs for protein crystallography. *Acta Crystallogr D* 50:760–763.
2. Schneider TR, Sheldrick GM (2002) Substructure solution with SHELXD. *Acta Crystallogr D* 58:1772–1779.
3. Vonrhein C, Blanc E, Roversi P, Bricogne G (2007) Automated structure solution with autoSHARP. *Methods Mol Biol* 364:215–30.
4. Terwilliger TC (2000) Maximum-likelihood density modification. *Acta Crystallogr D* 56:965–972.
5. Perrakis A, Morris R, Lamzin VS (1999) Automated protein model building combined with iterative structure refinement. *Nat Struct Biol* 6:458–463.
6. Murshudov GN, Vagin AA, Dodson EJ (1997) Refinement of macromolecular structures by the maximum-likelihood method. *Acta Crystallogr D* 53:240–255.
7. Emsley P, Cowtan K (2004) Coot: Model-building tools for molecular graphics. *Acta Crystallogr D* 60:2126–2132.
8. Winn MD, Murshudov GN, Papiz MZ (2003) Macromolecular TLS refinement in REFMAC at moderate resolutions. *Methods Enzymol* 374:300–321.
9. Crooks GE, Hon G, Chandonia JM, Brenner SE (2004) WebLogo: A sequence logo generator. *Genome Res* 14:1188–1190.



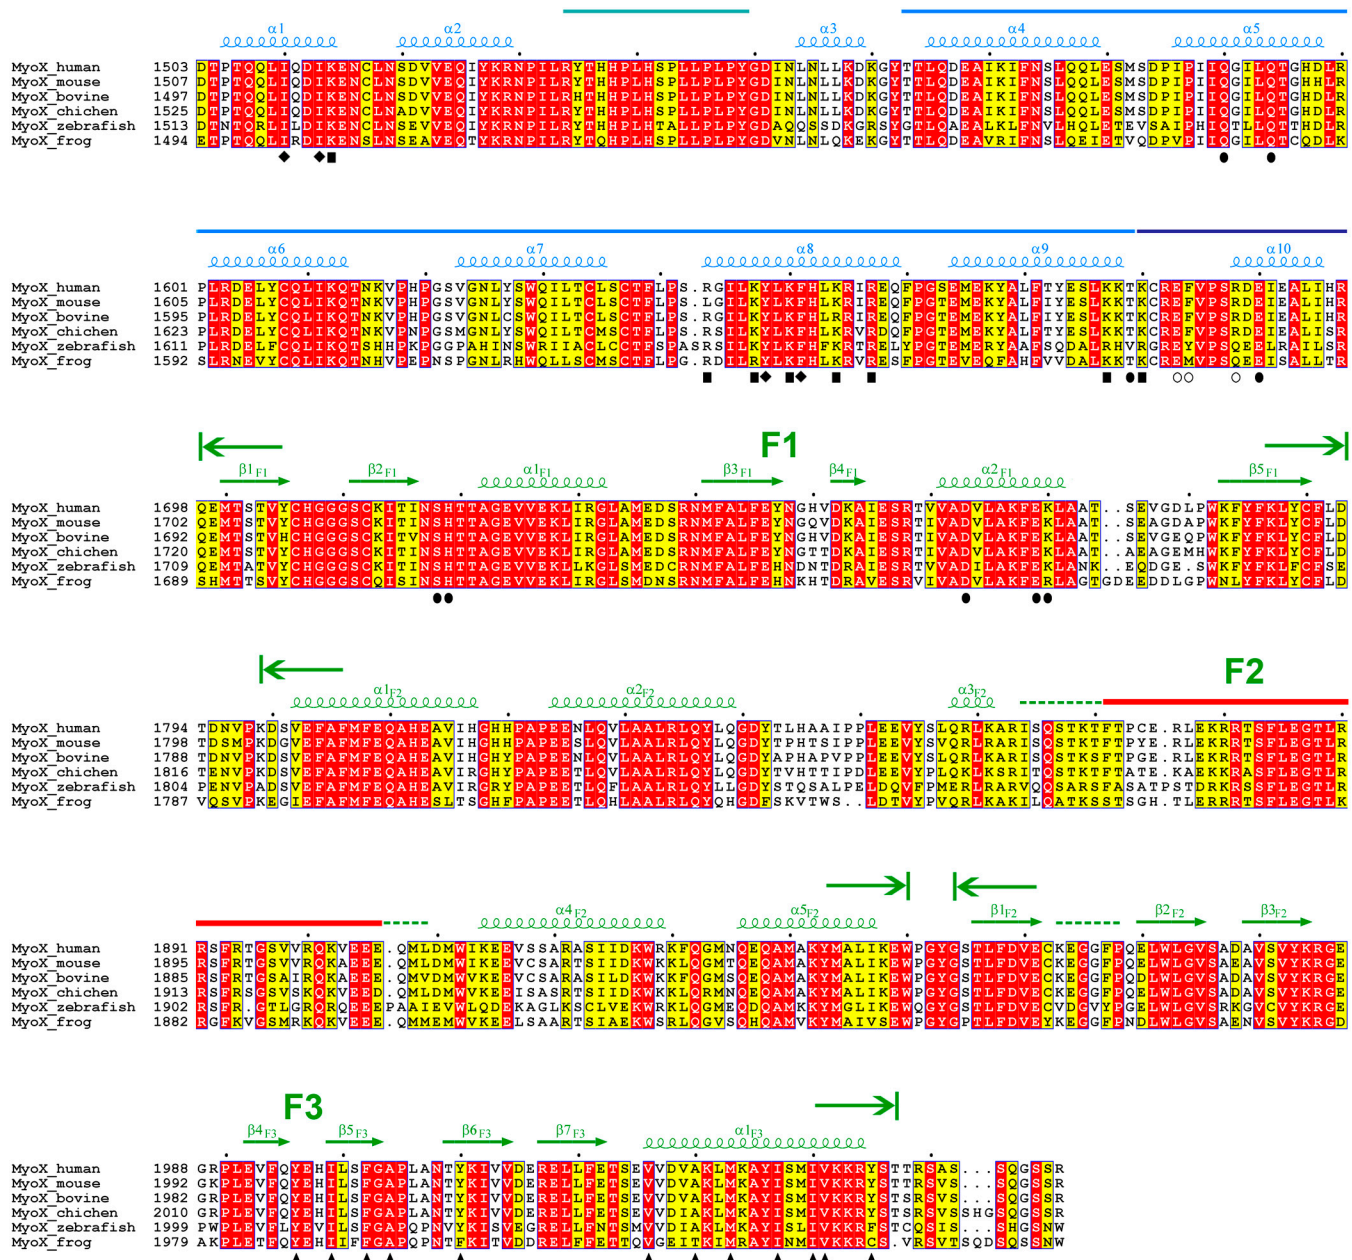

**Fig. S3.** Sequence alignment of MyoX\_MF from different species. Residues that are absolutely and highly conserved are shown in red and yellow boxes, respectively. The secondary structure elements are labeled above the alignment. The disordered regions in the structure are indicated by dashed lines. The 36-residue deletion in the  $\alpha 3/\alpha 4$ -loop of the F2 lobe is indicated by a red line. The boundaries of the MyTH4 domain (residues 1503–1697) and the three lobes of FERM are also indicated. The different segments in the MyTH4 domain are indicated by different color lines above the secondary structure elements (also see Fig. S4). Residues in the F3 lobe that are involved in the binding to DCC\_P3 are indicated by triangles. Residues forming interdomain sidechain and sidechain–mainchain hydrogen bonds in the MyTH4/F1 interface (see Fig. 6) are indicated by solid and open circles, respectively. Residues involved in forming the positively charged surface and the hydrophobic pocket on the MyTH4 (Fig. 3C and Fig. S7) are indicated by squares and diamonds, respectively.
